# Supplementary material
Source: Springer Nature journal article supplement (https://www.springermedizin.de/resource/supplementary/12891_2011_1509_MOESM2_ESM.pdf/9507992)

**a**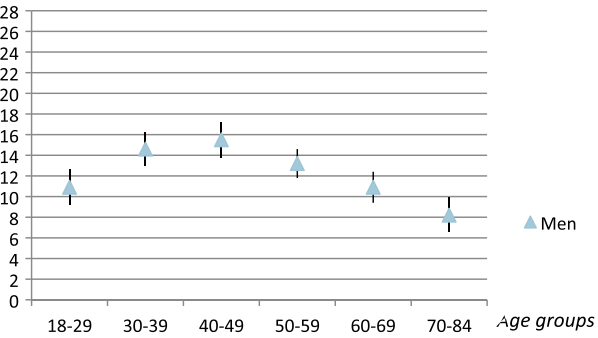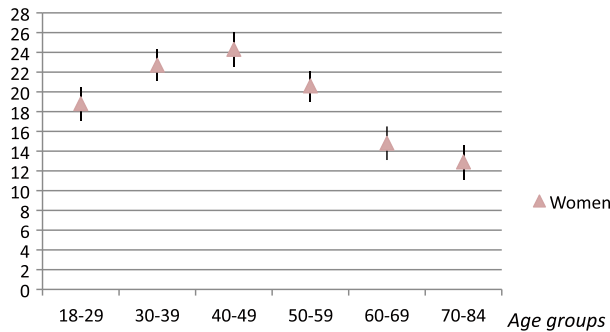**b**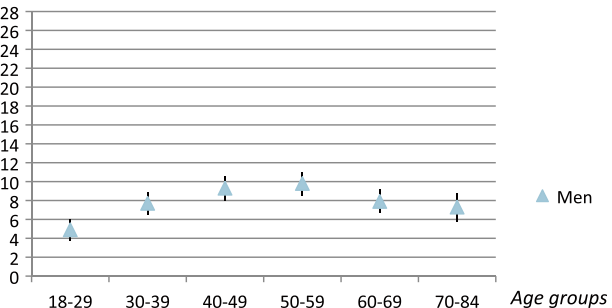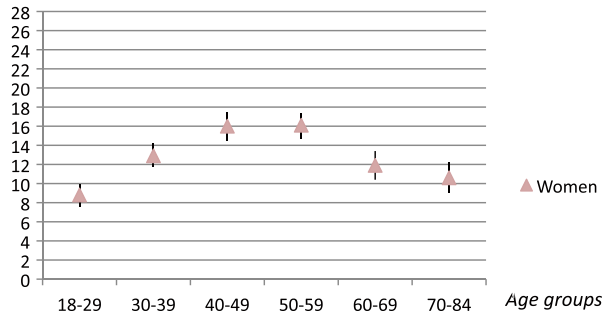

Supplement: MOESM2 [file 9507992]
